# Supplementary material for: Synthesis of tin nanodendrites via galvanic replacement reaction and their thermal conversion to nanodendritic tin oxide for ultrasensitive electrochemical sensing
Source: Royal Society of Chemistry journal article supplement (doi:10.1039/c1ra00433f), 2011-01-01
Supplement: c1ra00433f.pdf [file c1ra00433f.pdf]

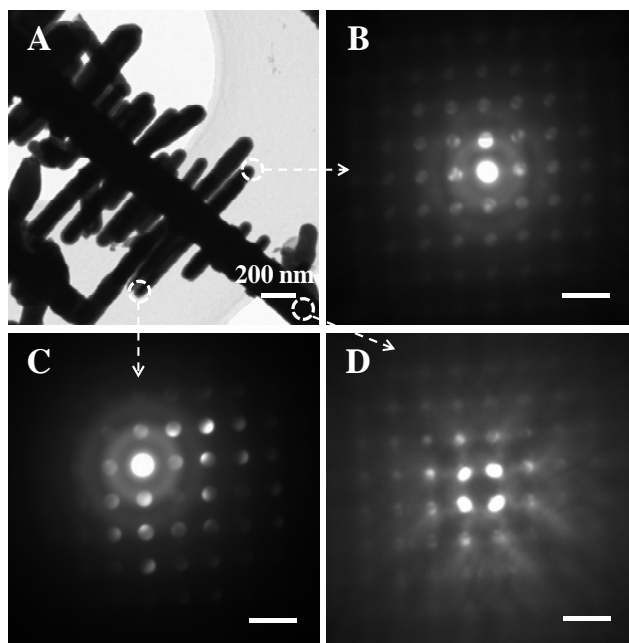

**Fig.S1** A. TEM image of Sn nanodendrites; B-D. The micro-XRD patterns for the corresponding regions in TEM image.
